# Supplementary material
Source: HighWire-hosted journal article supplement (https://ajnr-sso.highwirestaging.com/highwire/filestream/88656/field_highwire_adjunct_files/0/20-00676.pdf)
Supplement: 20-00676.pdf [file 20-00676.pdf]

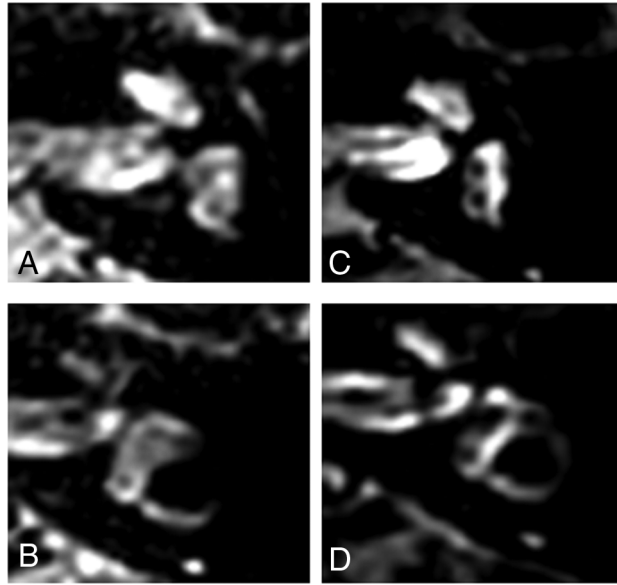

**ONLINE FIGURE.** The axial precontrast HT2W 3D FLAIR sequence (A and B) depicts the membranous labyrinth from a healthy adult's ear with a lower contrast-to-noise ratio compared with the same sequence acquired after 4.5 hours from IV gadolinium administration (C and D).
